# Supplementary material for: Thermal Analysis of Metal-Organic Precursors for Functional Cu:ΝiOx Hole Transporting Layer in Inverted Perovskite Solar Cells: Role of Solution Combustion Chemistry in Cu:ΝiOx Thin Films Processing
Source: MDPI journal article supplement (doi:10.3390/nano11113074), 2021-11-15
Supplement: s1 [file s1]

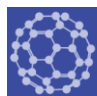

## Supplementary materials

# Thermal Analysis of Metal-Organic Precursors for Functional Cu:NiOx Hole Transporting Layer in Inverted Perovskite Solar Cells: Role of Solution Combustion Chemistry in Cu:NiOx Thin Films Processing

Apostolos Ioakeimidis <sup>1</sup>, Ioannis T. Papadas <sup>1,2</sup>, Eirini D. Koutsouroubi <sup>3</sup>, Gerasimos S. Armatas <sup>3</sup> and Stelios A. Choulis <sup>1,\*</sup>

<sup>1</sup> Molecular Electronics and Photonics Research Unit, Department of Mechanical Engineering and Materials Science and Engineering, Cyprus University of Technology, 3063 Limassol, Cyprus; a.ioakeimidis@cut.ac.cy (A.I.); ioannis.papadas@cut.ac.cy (I.T.P.)

<sup>2</sup> Department of Public and Community Health, School of Public Health, University of West Attica, Athens, Greece

<sup>3</sup> Department of Materials Science and Technology, University of Crete, 70013 Heraklion, Greece; eirinink@materials.uoc.gr (E.D.K.); garmatas@materials.uoc.gr (G.S.A.)

\* Correspondence: stelios.choulis@cut.ac.cy

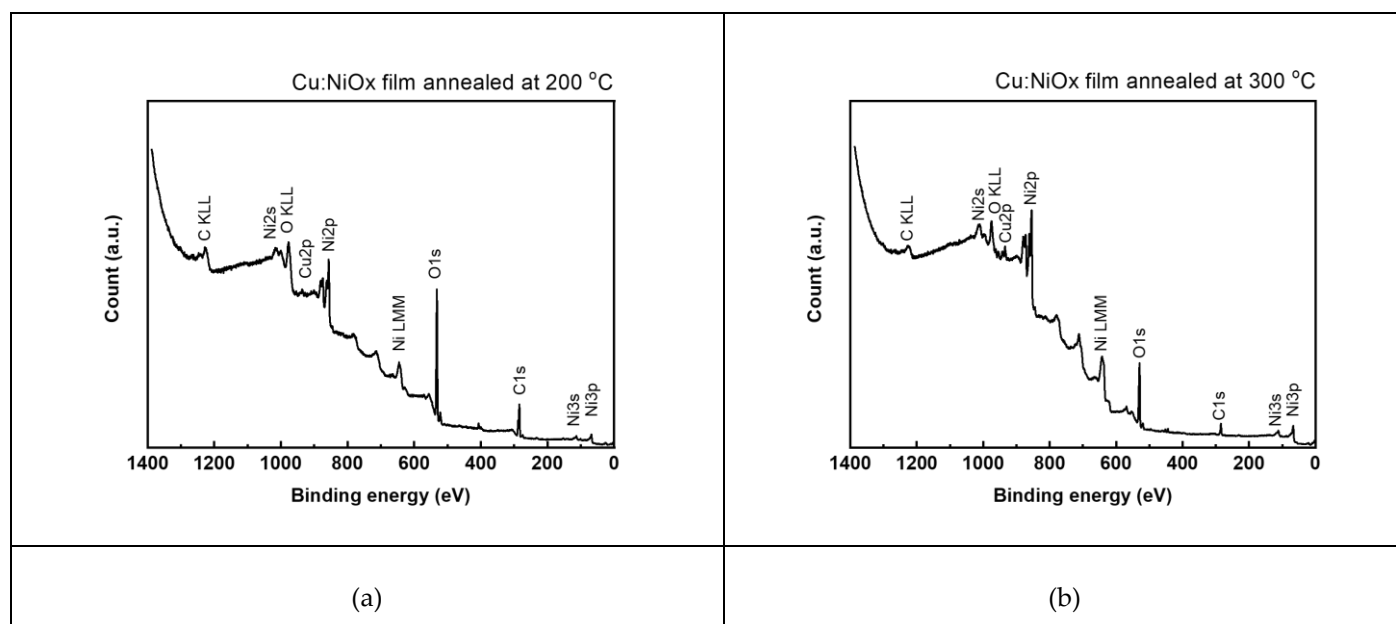

**Figure S1.** XPS survey spectra of the Cu:NiOx films fabricated from precursor containing 0.1 Acac and annealed at (a) 200 °C and (b) 300 °C.

**Table S1.** XPS calculated atomic ratios for the Cu:NiOx films fabricated from precursor containing 0.1 Acac and annealed at 200 and 300 °C.

| Sample                          | C <sup>[a]</sup><br>(%) | N <sup>[b]</sup><br>(%) | Ni<br>(%) | Cu<br>(%) | O<br>(%) |
|---------------------------------|-------------------------|-------------------------|-----------|-----------|----------|
| 200 °C annealed<br>Cu:NiOx film | 18.40                   | 8.05                    | 17.59     | 2.10      | 53.86    |
| 300 °C annealed<br>Cu:NiOx film | 3.26                    | 1.45                    | 42.11     | 5.22      | 47.95    |

<sup>[a]</sup>C-oxygen/nitrogen bonded species corresponding to a 6.51 and 0.64 wt.% content for 200 and 300 °C annealed Cu:NiOx films, respectively. <sup>[b]</sup>Nitrogen-containing species corresponding to a 3.32 and 0.33 wt.% content for 200 and 300 °C annealed Cu:NiOx films, respectively.

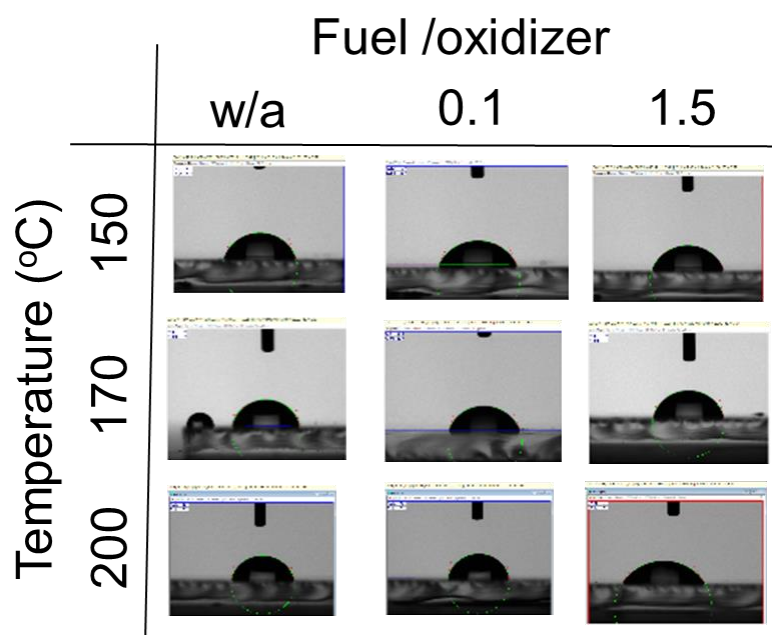

**Figure S2.** contact angle picture of water on films prepared using precursor containing w/o, 0.1 and 1.5 molar ratio of fuel (Acac) to oxidizer (Cu, Ni nitrates) annealed at 150, 170 and 200 °C, respectively.

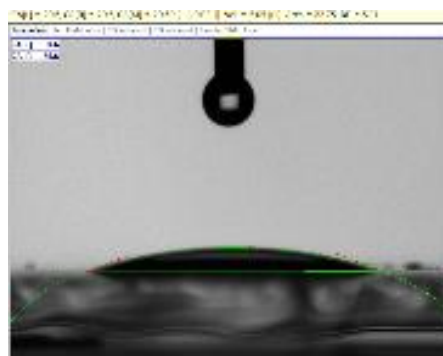

**Figure S3.** contact angle picture of water on films prepared using precursor 0.1 molar ratio of fuel (Acac) to oxidizer (Cu, Ni nitrates) annealed at 300 °C showing an angle of 20°.
